# Supplementary material for: Deforestation in Amazonia impacts riverine carbon dynamics
Source: Copernicus journal article supplement (doi:10.5194/esd-7-953-2016), 2016-12-09
Supplement: Supplementary file [file esd-7-953-2016-supplement.pdf]

Supplement of Earth Syst. Dynam., 7, 953–968, 2016  
<http://www.earth-syst-dynam.net/7/953/2016/>  
doi:10.5194/esd-7-953-2016-supplement  
© Author(s) 2016. CC Attribution 3.0 License.

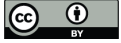

*Supplement of*

## **Deforestation in Amazonia impacts riverine carbon dynamics**

**Fanny Langerwisch et al.**

*Correspondence to:* Fanny Langerwisch ([langewisch@pik-potsdam.de](mailto:langewisch@pik-potsdam.de))

The copyright of individual parts of the supplement might differ from the CC-BY 3.0 licence.

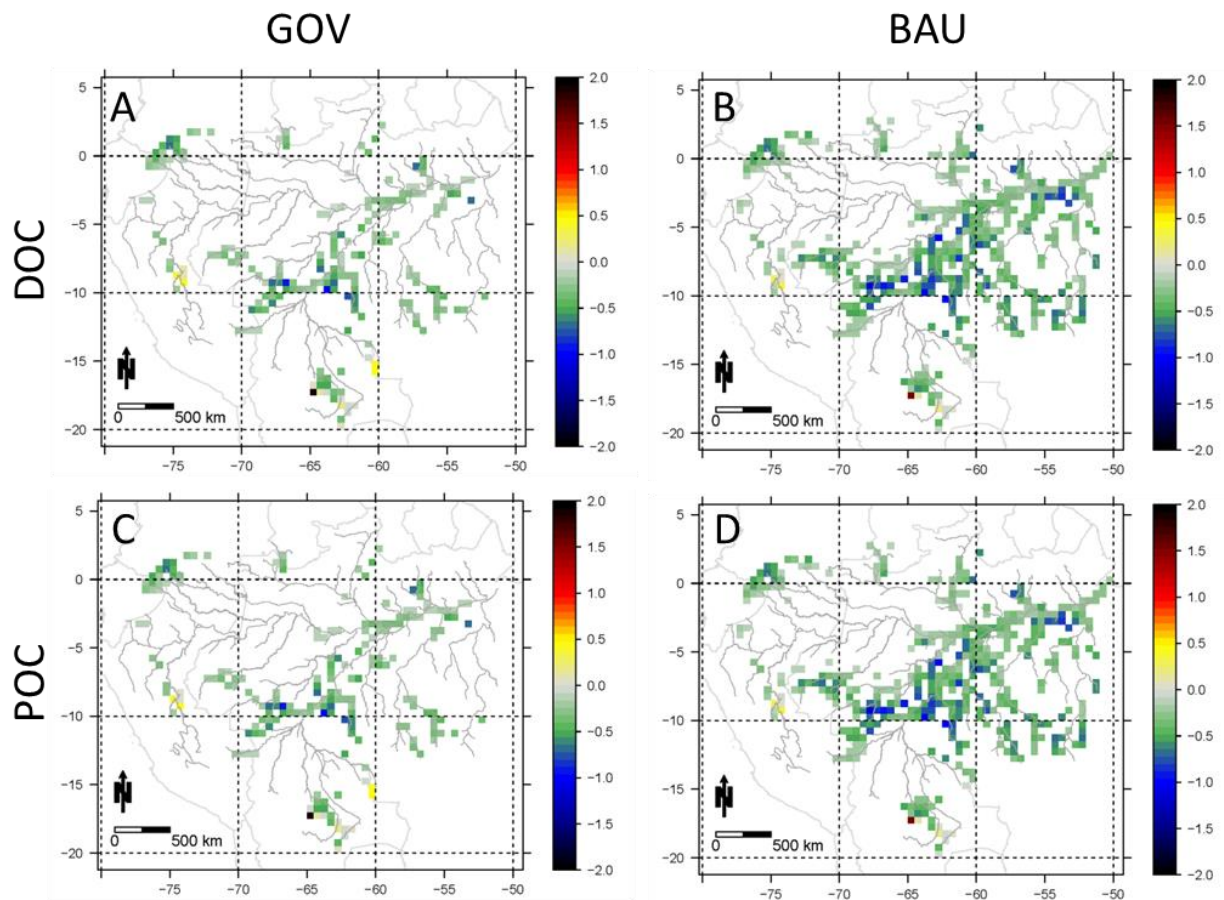

22

23 **Figure S1: Similar change in dissolved (A, B) and particulate organic carbon (C, D) due**  
 24 **to deforestation.** SRES scenario is A1B, climate model is MPI-ECHAM5. Positive values  
 25 (yellow and red) indicate a gain and negative values (green and blue) indicate a loss in carbon  
 26 caused by deforestation (GOV and BAU). Only cells with significant changes ( $p < 0.05$ ,  
 27 Wilcoxon Rank Sum Test) are shown.

28

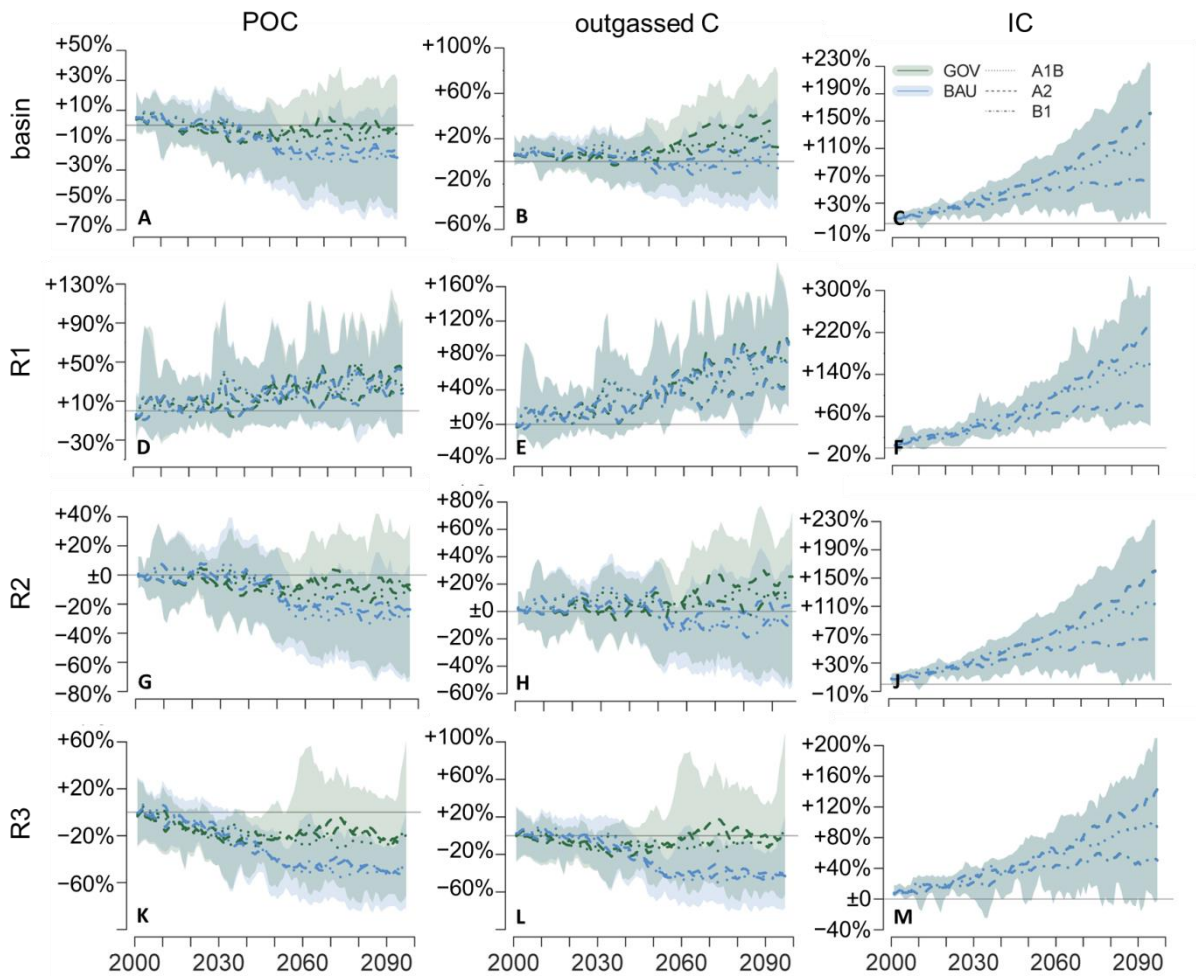

29

30 **Figure S2: Temporal change in riverine organic carbon due to the combination of**  
 31 **climate and land use change.** Change of annual sum of carbon in the deforestation scenario  
 32 (GOV or BAU) compared to the NatVeg scenario (average over 1971-2000) for the whole  
 33 basin (A-C) and the three sub-regions (R1-R3; D-M) as 5-year-mean for GOV (green) and  
 34 BAU (blue), representing  $E_{CCDefor}$ . The shaded areas indicate the full range of values of all  
 35 five climate models. Bold lines represent the 5-year-mean of the five climate models.

36

37
